# Supplementary material for: FOXO3 longevity genotype mitigates the increased mortality risk in men with a cardiometabolic disease
Source: publisher site journal article supplement (doi:10.18632/aging.202175), 2020-12-01
Supplement: Supplementary file [file aging-v12i23-202175-supplementary-material-SD2.pdf]

## SUPPLEMENTARY FIGURES

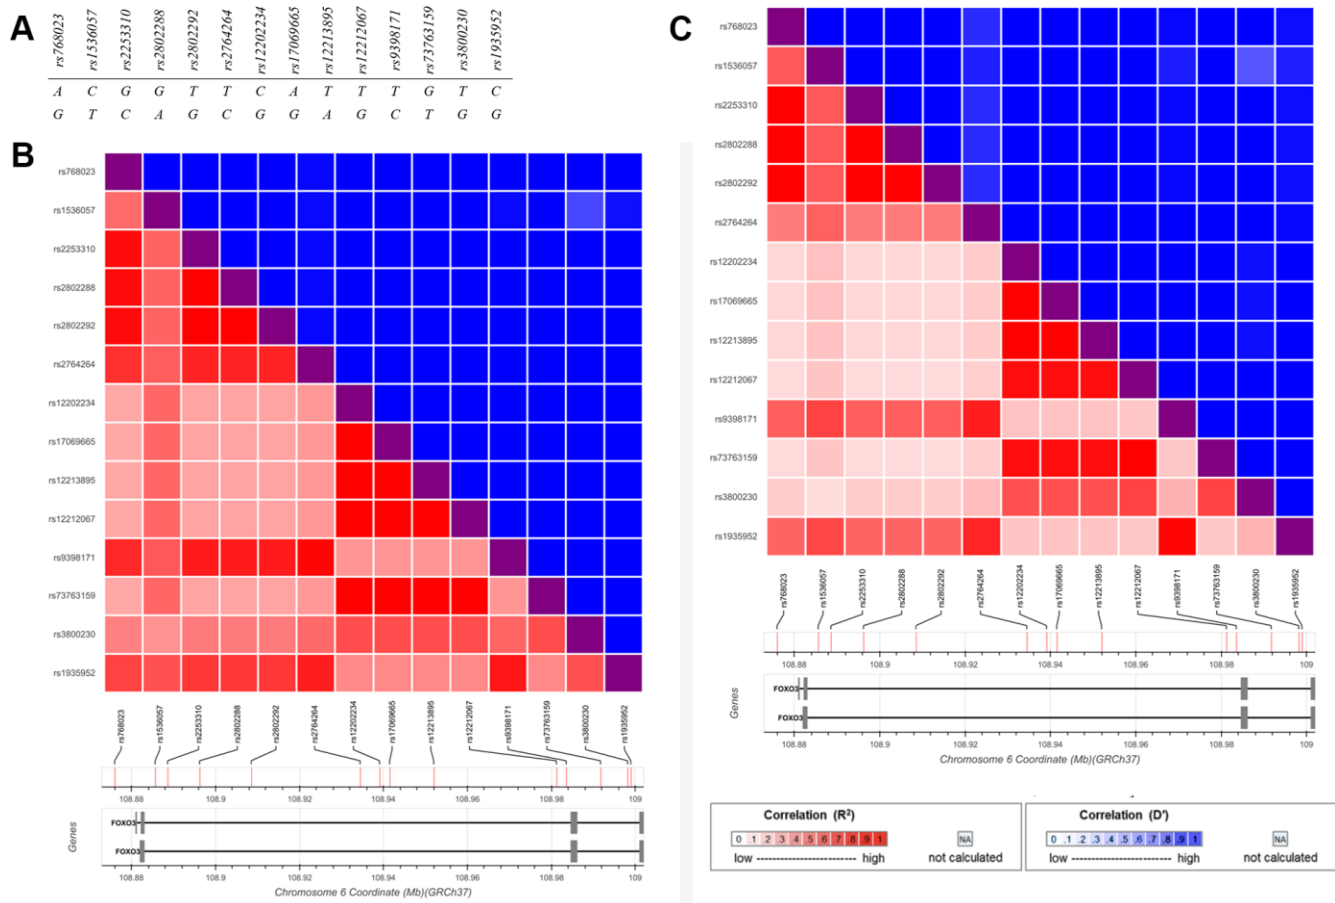

**Supplementary Figure 1. Linkage disequilibrium and haplotypes of 14 *FOXO3* longevity-associated SNPs.** (A) The 14 *FOXO3* longevity-associated SNPs (and alleles) that comprise the full haplotype. (B) Linkage disequilibrium in *FOXO3* and SNP locations – Japanese (JPN). (C) Linkage disequilibrium in *FOXO3* and SNP locations – Caucasian (CEU). LD matrix plot showing the 14 *FOXO3* SNPs using the program LDlink (<https://ldlink.nci.nih.gov>). In the Japanese population data, shown in part (B) of Supplementary Figure 1, the data are from “JPN” population data from Phase 3 (Version 5) of the 1000 Genomes Project (<https://www.internationalgenome.org>). In the Caucasian population the values are from the “CEU” data. Note that the JPN data have a higher overall level of linkage disequilibrium (i.e., red intensities). Red squares denote blocks that have a Hedrick’s multiallelic  $R^2 = 1$ , whereas blue squares denote blocks that have a  $R^2$  value  $< 1$  [Hedrick PW. Gametic disequilibrium measures: Proceed with caution. *Genetics*. 1987; 117:331-342]. Blue blocks denote  $D'$  values.

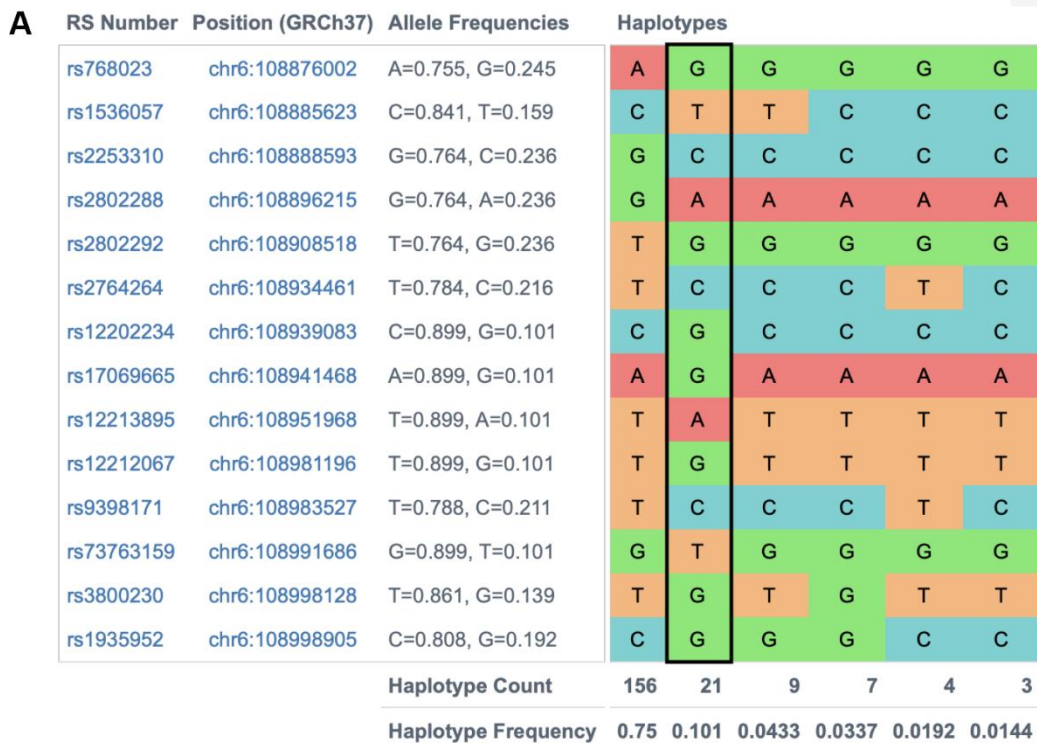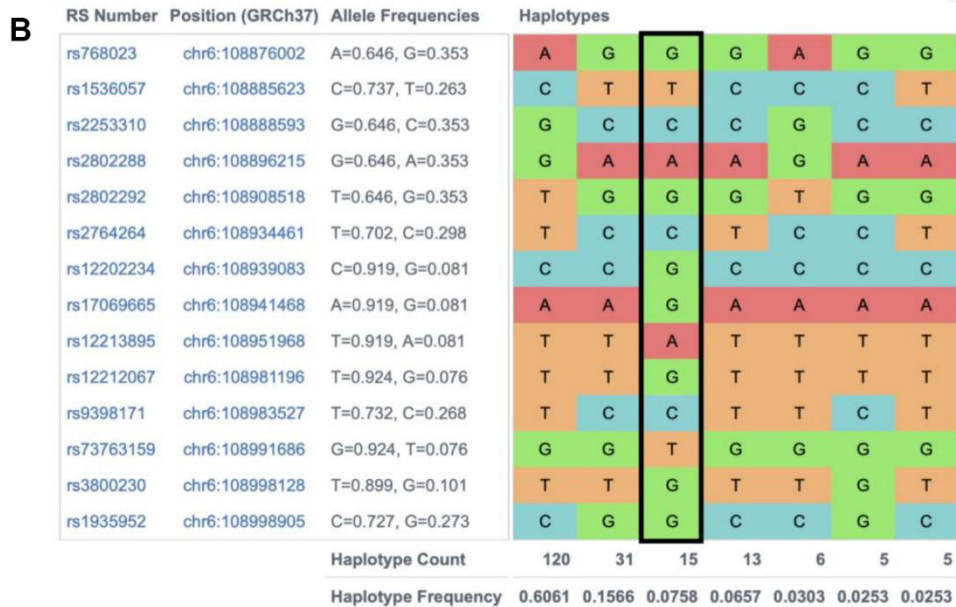

**Supplementary Figure 2. FOXO3 longevity haplotypes.** (A) Japanese Haplotype – allele frequency of haplotype = 0.10. (B) Caucasian haplotype – allele frequency of haplotype = 0.76. Tables of observed haplotypes were generated using LDHap (<https://ldlink.nci.nih.gov/?tab=ldhap>). Haplotypes with frequencies greater than 1% are displayed vertically and ordered by observed frequency in the selected query sub-population. Variant bi-allelic genotypes and frequencies are reported in rows and are sorted by genomic position. Links are available to dbSNP (<https://www.ncbi.nlm.nih.gov/snp/>) RS numbers and coordinates in the UCSC Genome Browser (<http://genome.ucsc.edu/cgi-bin/hgGateway>; version GRCh37 is shown). Reference populations were “JPN” Japanese, shown in “A”, and “CEU” Caucasian, shown in “B”, using data from Phase 3 (Version 5) of the 1000 Genomes Project (<https://www.internationalgenome.org>). Rectangles highlight the longevity haplotype (minor alleles noted in Supplementary Figure 1) that has a frequency of 0.101 in the Japanese population and 0.758 in Caucasians.
