# Supplementary material for: FOXO3 longevity genotype mitigates the increased mortality risk in men with a cardiometabolic disease
Source: publisher site journal article supplement (doi:10.18632/aging.202175), 2020-12-01
Supplement: Supplementary file [file aging-v12i23-202175-supplementary-material-SD3.pdf]

## SUPPLEMENTARY TABLES

**Supplementary Table 1. Age-adjusted characteristics of subjects at baseline for *FOXO rs2802292 TT* genotype and *G*-allele carriers.**

| Variable                            | <i>TT</i>    | <i>GT/GG</i> | <b>p</b> |
|-------------------------------------|--------------|--------------|----------|
| n                                   | 1901         | 1683         |          |
| Age (years)                         | 77.0 ± 4.5   | 78.0 ± 4.7   | 0.0008   |
| BMI (kg/m <sup>2</sup> )            | 23.5 ± 3.2   | 23.5 ± 3.1   | 0.81     |
| Fasting plasma glucose (mg/dl)      | 112.3 ± 28.0 | 113.9 ± 31.0 | 0.090    |
| Smoking (pack-years)                | 25.4 ± 33.5  | 27.0 ± 35.3  | 0.20     |
| Alcohol intake (oz/mo)              | 18.7 ± 39.8  | 19.0 ± 41.4  | 0.83     |
| Physical activity index             | 30.9 ± 4.7   | 30.9 ± 4.5   | 0.94     |
| Depressive symptoms (%)             | 10.0         | 11.2         | 0.29     |
| Stroke (%)                          | 4.5          | 4.4          | 0.85     |
| Cancer (%)                          | 14.3         | 12.8         | 0.22     |
| CHD (%)                             | 22.3         | 18.7         | 0.009    |
| Diabetes (%)                        | 27.0         | 30.4         | 0.027    |
| Hypertension (%)                    | 53.1         | 54.1         | 0.55     |
| CHD or diabetes or hypertension (%) | 70.0         | 70.2         | 0.92     |

Values shown are age-adjusted mean ± SD for indirect measures and proportion for direct measurements.

**Supplementary Table 2. Effects of minor alleles on transcription factor (TF) binding.**

| <b>SNP</b>        | <b>Result</b> | <b>TF</b> | <b>Biological Pathways</b>                                           | <b>Tissue*</b>                                                               |
|-------------------|---------------|-----------|----------------------------------------------------------------------|------------------------------------------------------------------------------|
| <i>rs768023</i>   | abolish       | FOXA2     | stem cell maintenance, vascular epithelia, diabetes, energy response | Liver, Lung, Pancreas, Stomach                                               |
|                   | abolish       | HDAC      | stem cell maintenance                                                | Lymphoblasts, Colon, Esophagus, Ovary, Small Intestine, Spleen, Thyroid      |
| <i>rs1536057</i>  | abolish       | NRF1      | stem cell maintenance                                                | Brain                                                                        |
|                   | abolish       | E2F       | DNA damage response                                                  | Lymphoblasts                                                                 |
|                   | create        | POU5F1    | stem cell maintenance                                                | -                                                                            |
| <i>rs2253310</i>  | create        | TFCP2L1   | stem cell maintenance                                                | Kidney, Salivary Gland, Skin, Thyroid                                        |
| <i>rs2802288</i>  | create        | MYF       | stem cell maintenance, muscle atrophy                                | Muscle                                                                       |
| <i>rs2764264</i>  | abolish       | NKX3      | stem cell maintenance                                                | Salivary Gland, Prostate                                                     |
| <i>rs2802292</i>  | create        | HSF1      | stress response                                                      | most tissues, not Brain                                                      |
| <i>rs12202234</i> | abolish       | FOXA      | stem cell maintenance, vascular epithelia, diabetes, energy response | Bladder, Breast, Prostate                                                    |
| <i>rs17069665</i> | abolish       | MITF      | stem cell maintenance                                                | Cervix, Uterus                                                               |
| <i>rs12213895</i> | create        | MEF2      | stem cell maintenance                                                | Artery, Lung, Skin                                                           |
| <i>rs12212067</i> | create        | MZF1      | stem cell maintenance                                                | Brain, Lung, Ovary, Pituitary, Prostate, Thyroid, Uterus                     |
| <i>rs9398171</i>  | create        | NR2F1     | stem cell maintenance                                                | Bladder, Brain, Cervix, Fallopian Tube, Lung, Nerve, Ovary, Prostate, Uterus |
|                   | create        | HNF4      | diabetes, energy response,                                           | Colon, Liver, Small Intestine                                                |
|                   | abolish       | ONECUT1   | stem cell maintenance, diabetes, energy response                     | Liver, Pancreas                                                              |
| <i>rs73763159</i> | abolish       | PRDM1     | stem cell maintenance                                                | Esophagus, Vagina                                                            |
| <i>rs3800230</i>  | abolish       | FOXP1     | stem cell maintenance                                                | -                                                                            |
| <i>rs1935952</i>  | abolish       | MZF1      | stem cell maintenance                                                | Brain, Lung, Ovary, Pituitary, Prostate, Thyroid, Uterus                     |

The 14 SNPs modify 19 TF binding sites shown below, along with their functions. SNP ID# is variant name from the database dbSNP, create/abolish refers to whether the minor allele creates or abolishes a TF binding site.

Significant variants were identified previously [Donlon, T.A., et al. FOXO3 longevity interactome on chromosome 6. *Aging Cell*. 2017; 16:1016-1025] using HaploReg (<https://pubs.broadinstitute.org/mammals/haploreg/haploreg.php>), which is a tool for exploring annotations of the noncoding genome at variants on haplotype blocks, such as candidate regulatory SNPs at disease-associated loci [Ward, L.D. & Kellis, M. HaploReg: a resource for exploring chromatin states, conservation, and regulatory motif alterations within sets of genetically linked variants. *Nucleic Acids Res*. 2012; 40 (Database issue):D930-934]. Expression data are from GTEx; \* >100 TPM.
